# Supplementary material
Source: PubMed Central journal article supplement (PMC6994993)
Supplement: pnas.1915424117.sapp.pdf [file pnas.1915424117.sapp.pdf]

## Supplementary Materials for:

### Physiological Responses to Gravity in an Insect

**Authors:** Jon F. Harrison<sup>1\*</sup>, Khaled Adjerid<sup>2</sup>, Anelia Kassi<sup>1</sup>, C. Jaco Klok<sup>1†</sup>, John M. VandenBrooks<sup>1††</sup>, Meghan E. Duell<sup>1</sup>, Jacob B. Campbell<sup>1</sup>, Stav Talal<sup>1</sup>, Christopher D. Abdo<sup>1</sup>, Kamel Fezzaa<sup>3</sup>, Hodjat Pendar<sup>2</sup> and John J. Socha<sup>2</sup>

#### **Affiliations:**

<sup>1</sup>School of Life Sciences, Arizona State University, Tempe, AZ 85287-4501 USA.

<sup>2</sup>Dept. of Biomedical Engineering and Mechanics, Virginia Tech, 495 Old Turner St., Blacksburg, VA 24061 USA.

<sup>3</sup>X-ray Science Division, Argonne National Laboratory, 9700 S Cass Ave, Lemont, IL, USA.

<sup>†</sup>Current address: Sable Systems International, 3840 N. Commerce St., North Las Vegas, NV 89032 USA.

<sup>††</sup>Current address: Dept. of Physiology, Midwestern University, Glendale, AZ 85308 USA.

\*Corresponding author: [j.harrison@asu.edu](mailto:j.harrison@asu.edu)

**Table S1.** Data used for testing the effect of body orientation and region on the percent of the image occupied by air sacs or tracheae. Animals labeled with A were adults, while those labeled with a J were 3rd instars.

| Animal | Region  | Structure | Head-Up | Head-Down | Prone |
|--------|---------|-----------|---------|-----------|-------|
| A1     | Head    | Air Sacs  | 88      | 2         | 79    |
| A2     | Head    | Air Sacs  | 100     | 22        | 39    |
| A3     | Head    | Air Sacs  | 100     | 0         | 77    |
| A4     | Head    | Air Sacs  | 97      | 3         | 53    |
| J1     | Head    | Air Sacs  | 41      | 72        | J1    |
| J2     | Head    | Air Sacs  | 39      | 0         | j2    |
| J3     | Head    | Air Sacs  | 71      | 0         | j3    |
| J4     | Head    | Air Sacs  | 0       | 0         | j4    |
| J5     | Head    | Air Sacs  | 0       | 0         | j5    |
| J6     | Head    | Air Sacs  | 0       | 0         | j6    |
| J7     | Head    | Air Sacs  | 81      | 14        | j7    |
| A1     | Abdomen | Air Sacs  | 10      | 83        | 32    |
| A2     | Abdomen | Air Sacs  | 23      | 41        | 53    |
| A3     | Abdomen | Air Sacs  | 18      | 61        | 11    |
| A4     | Abdomen | Air Sacs  | 29      | 58        | 80    |
| J1     | Abdomen | Air Sacs  | 0       | 4         |       |
| J2     | Abdomen | Air Sacs  | 7       | 6         |       |
| J3     | Abdomen | Air Sacs  | 4       | 6         |       |
| J4     | Abdomen | Air Sacs  | 6       | 12        |       |
| J5     | Abdomen | Air Sacs  | 14      | 10        |       |
| J6     | Abdomen | Air Sacs  | 2       | 3         |       |
| J7     | Abdomen | Air Sacs  | 2       | 6         |       |
| A1     | Head    | Tracheae  | 0       | 13        | 9     |
| A2     | Head    | Tracheae  | 0       | 5         | 0     |
| A3     | Head    | Tracheae  | 0       | 5         | 44    |
| A4     | Head    | Tracheae  | 6       | 3         | 5     |
| J1     | Head    | Tracheae  | 0       | 10        |       |
| J2     | Head    | Tracheae  | 15      | 18        |       |
| J3     | Head    | Tracheae  | 0       | 18        |       |
| J4     | Head    | Tracheae  | 0       | 24        |       |
| J5     | Head    | Tracheae  | 24      | 1         |       |
| J6     | Head    | Tracheae  | 27      | 14        |       |
| J7     | Head    | Tracheae  | 0       | 0         |       |
| A1     | Abdomen | Tracheae  | 38      | 20        | 12    |
| A2     | Abdomen | Tracheae  | 0       | 43        | 12    |
| A3     | Abdomen | Tracheae  | 0       | 0         | 11    |
| A4     | Abdomen | Tracheae  | 10      | 3         | 2     |
| J1     | Abdomen | Tracheae  | 39      | 0         |       |
| J2     | Abdomen | Tracheae  | 23      | 30        |       |
| J3     | Abdomen | Tracheae  | 57      | 30        |       |
| J4     | Abdomen | Tracheae  | 34      | 17        |       |
| J5     | Abdomen | Tracheae  | 28      | 30        |       |
| J6     | Abdomen | Tracheae  | 23      | 23        |       |
| J7     | Abdomen | Tracheae  | 32      | 33        |       |

**Table S2.** Data used for testing the effect of N<sub>2</sub>-anesthesia on the logit-transformed proportion of head images occupied by air sacs.

| animal | orientation | condition | Logit airsacs |
|--------|-------------|-----------|---------------|
| 17     | down        | normoxia  | -0.55         |
| 17     | down        | anoxia    | -1.69         |
| 14     | down        | normoxia  | -0.75         |
| 14     | down        | anoxia    | -3.99         |
| 13     | up          | normoxia  | 0.219         |
| 13     | up          | anoxia    | 2.99          |
| 15     | up          | normoxia  | -0.27         |
| 15     | up          | anoxia    | 2.99          |
| 16     | up          | normoxia  | 0.912         |
| 16     | up          | anoxia    | 1.69          |

**Table S3.** Difference in percent of the insect body cross-sectional area occupied by the tracheal system at each of the 13 equidistant locations along the length of the 8 grasshoppers imaged using  $\mu$ CT. Location 1 is the most anterior, and location 13 the most posterior. Positive values indicate that head-up animals had a greater percent of the image area occupied by tracheal system structure than head-down animals, whereas negative values indicate the converse.

|             | Specimen<br>1 | Specimen<br>2 | Specimen<br>3 | Specimen<br>4 | Specimen<br>5 | Specimen<br>6 | Specimen<br>7 | Specimen<br>8 |
|-------------|---------------|---------------|---------------|---------------|---------------|---------------|---------------|---------------|
| Location 1  | 14.36         | 12.46         | 14.01         | 14.01         | 11.97         | -2.73         | 0.61          | -8.13         |
| Location 2  | 24.09         | 21.95         | 9.44          | 10.19         | 20.10         | 24.94         | 8.28          | -24.10        |
| Location 3  | -0.07         | 29.30         | 28.51         | 22.07         | 14.08         | 21.14         | -4.56         | -21.07        |
| Location 4  | -10.65        | 9.16          | 7.90          | 7.34          | 7.18          | -4.64         | 4.86          | -22.68        |
| Location 5  | -9.22         | 2.46          | -1.19         | 6.57          | 2.08          | 7.65          | -11.93        | -19.97        |
| Location 6  | -34.25        | 13.49         | 20.36         | 30.31         | -20.05        | 8.56          | -7.08         | 29.02         |
| Location 7  | -53.19        | -29.17        | -11.80        | 12.49         | -25.15        | -15.22        | -3.08         | 11.50         |
| Location 8  | -16.79        | -32.53        | -25.32        | -2.43         | -49.52        | -16.41        | -0.63         | -38.42        |
| Location 9  | -27.80        | -4.62         | -18.99        | -13.80        | -20.77        | -3.19         | -7.78         | 23.88         |
| Location 10 | -38.28        | -2.29         | -18.12        | -8.58         | -2.59         | -1.70         | -3.86         | 16.86         |
| Location 11 | -23.82        | -10.22        | -27.03        | -24.71        | -1.24         | -0.71         | -10.63        | -8.50         |
| Location 12 | -13.12        | -27.65        | -41.86        | -25.13        | -2.66         | -5.96         | -20.65        | 30.29         |
| Location 13 | -2.49         | -0.66         | -18.50        | -1.20         | -5.69         | -0.21         | -24.57        | 15.72         |

**Table S4.** Results of 3-way ANOVA, testing effects of condition (normoxia vs. anoxia), orientation (up or down) and segment (cranial or caudal third) on the proportion of hemolymph in each segment (logit-transformed to achieve normality), using prone, head-up and head-down animals, with animal as a random factor. There was a highly significant interaction between orientation and segment, indicating that orientation significantly affected hemolymph distribution, and a significant three-way interaction between orientation, condition and segment, indicating that anoxia influenced the effect of orientation on hemolymph distribution.

| Parameter                     | Df | SS    | MS    | F      | P            |
|-------------------------------|----|-------|-------|--------|--------------|
| Orientation                   | 2  | 0.000 | 0.000 | 0.000  | 1.0          |
| Condition                     | 1  | 0.000 | 0.000 | 0.000  | 1.0          |
| Segment                       | 1  | 6.044 | 6.044 | 93.621 | 7.40e-16 *** |
| orientation:condition         | 1  | 0.000 | 0.000 | 0.000  | 1.0          |
| orientation:segment           | 2  | 2.205 | 1.103 | 17.080 | 4.51e-07 *** |
| condition:segment             | 2  | 0.320 | 0.320 | 4.963  | 0.028*       |
| orientation:condition:segment | 1  | 0.478 | 0.478 | 7.402  | 0.0077**     |
| Residuals                     | 96 | 6.198 | 0.065 |        |              |

**Table. S5.**

Results of 3-way ANOVA, using animal as a random factor, testing effects of condition (normoxia vs. anoxia), orientation (up or down) and segment (cranial or caudal thirds) on the proportion of hemolymph in each segment (logit-transformed), using only head-up and head-down animals. There was a highly significant interaction between orientation and segment, indicating that orientation significantly affected hemolymph distribution, and a significant three-way interaction between orientation, condition and segment, indicating that anoxia influenced the effect of orientation on hemolymph distribution.

| Parameter                     | DF | SS    | MS    | F      | P            |
|-------------------------------|----|-------|-------|--------|--------------|
| Orientation                   | 1  | 0.000 | 0.000 | 0.000  | 1.0          |
| Condition                     | 1  | 0.000 | 0.000 | 0.00   | 1.0          |
| Segment                       | 1  | 4.528 | 4.528 | 80.307 | 1.97e-13***  |
| orientation:condition         | 1  | 0.00  | 0.000 | 0.000  | 1.0          |
| orientation:segment           | 1  | 2.200 | 2.200 | 39.019 | 2.41e-08 *** |
| condition:segment             | 1  | 0.320 | 0.320 | 5.683  | 0.0197*      |
| orientation:condition:segment | 1  | 0.478 | 0.478 | 8.476  | 0.005**      |
| Residuals                     | 74 | 4.173 | 0.056 |        |              |

**Table S6.** Data used for testing effect of body orientation and N<sub>2</sub>-anesthesia on the distribution of hemolymph, tracked using <sup>3</sup>H-inulin. The column labeled “propcounts” indicates the proportion of <sup>3</sup>H counts (disintegrations per min) for that animal in each segment (animals were divided into thirds).

| condition | orientation | animal | segment | counts   | propcounts | logitcounts |
|-----------|-------------|--------|---------|----------|------------|-------------|
| normoxia  | prone       | V      | cranial | 2854.98  | 0.156      | -0.731      |
| normoxia  | prone       | V      | caudal  | 11246.4  | 0.616      | 0.206       |
| normoxia  | prone       | V      | mid     | 4132.73  | 0.226      | -0.533      |
| normoxia  | prone       | X      | cranial | 6760.23  | 0.462      | -0.0658     |
| normoxia  | prone       | X      | caudal  | 2516.94  | 0.172      | -0.682      |
| normoxia  | prone       | X      | mid     | 5350.35  | 0.365      | -0.239      |
| normoxia  | prone       | Z      | cranial | 9408.98  | 0.574      | 0.131       |
| normoxia  | prone       | Z      | caudal  | 3773.74  | 0.230      | -0.523      |
| normoxia  | prone       | Z      | mid     | 3183.52  | 0.194      | -0.617      |
| normoxia  | down        | W      | cranial | 3497.12  | 0.253      | -0.469      |
| normoxia  | down        | W      | caudal  | 1805.96  | 0.130      | -0.822      |
| normoxia  | down        | W      | mid     | 8508.53  | 0.616      | 0.205       |
| normoxia  | down        | Y      | cranial | 24116.23 | 0.829      | 0.688       |
| normoxia  | down        | Y      | caudal  | 2553.66  | 0.0878     | -1.016      |
| normoxia  | down        | Y      | mid     | 2390.5   | 0.0822     | -1.048      |
| normoxia  | down        | Alpha  | cranial | 11796.68 | 0.310      | -0.346      |
| normoxia  | down        | Alpha  | caudal  | 2313.57  | 0.0609     | -1.188      |
| normoxia  | down        | Alpha  | mid     | 23841.58 | 0.628      | 0.228       |
| normoxia  | prone       | P      | cranial | 2260.68  | 0.260      | -0.453      |
| normoxia  | prone       | P      | caudal  | 571.41   | 0.0658     | -1.152      |
| normoxia  | prone       | P      | mid     | 5846.69  | 0.673      | 0.315       |
| normoxia  | prone       | R      | cranial | 944.39   | 0.440      | -0.104      |
| normoxia  | prone       | R      | caudal  | 291.73   | 0.136      | -0.803      |
| normoxia  | prone       | R      | mid     | 908.03   | 0.423      | -0.134      |
| normoxia  | prone       | T      | cranial | 2880.4   | 0.367      | -0.236      |
| normoxia  | prone       | T      | caudal  | 2337.22  | 0.297      | -0.372      |
| normoxia  | prone       | T      | mid     | 2627.15  | 0.334      | -0.298      |
| normoxia  | down        | Q      | cranial | 1946.56  | 0.174      | -0.674      |
| normoxia  | down        | Q      | caudal  | 2825.82  | 0.253      | -0.469      |
| normoxia  | down        | Q      | mid     | 6370.38  | 0.572      | 0.125       |
| normoxia  | down        | S      | cranial | 3746.5   | 0.409      | -0.159      |
| normoxia  | down        | S      | caudal  | 2399.12  | 0.262      | -0.450      |
| normoxia  | down        | S      | mid     | 3009.25  | 0.329      | -0.310      |
| normoxia  | down        | U      | cranial | 3158.57  | 0.413      | -0.153      |
| normoxia  | down        | U      | caudal  | 1906.54  | 0.249      | -0.479      |

|          |       |   |        |          |       |        |
|----------|-------|---|--------|----------|-------|--------|
| normoxia | down  | U | mid    | 2590.31  | 0.338 | -0.291 |
| normoxia | up    | D | head   | 1547.59  | 0.196 | -0.612 |
| normoxia | up    | D | caudal | 893.14   | 0.113 | -0.894 |
| normoxia | up    | D | mid    | 5446.56  | 0.691 | 0.349  |
| normoxia | up    | E | head   | 1091.63  | 0.173 | -0.680 |
| normoxia | up    | E | caudal | 1089.96  | 0.173 | -0.681 |
| normoxia | up    | E | mid    | 4135.67  | 0.655 | 0.278  |
| normoxia | up    | F | head   | 7360.09  | 0.252 | -0.472 |
| normoxia | up    | F | caudal | 5906.71  | 0.202 | -0.595 |
| normoxia | up    | F | mid    | 15903.6  | 0.545 | 0.079  |
| normoxia | up    | G | head   | 6728.2   | 0.223 | -0.542 |
| normoxia | up    | G | caudal | 4272.73  | 0.142 | -0.783 |
| normoxia | up    | G | mid    | 19184.13 | 0.636 | 0.242  |
| normoxia | up    | H | head   | 10556.24 | 0.401 | -0.174 |
| normoxia | up    | H | caudal | 6018.42  | 0.229 | -0.528 |
| normoxia | up    | H | mid    | 9747.8   | 0.370 | -0.231 |
| normoxia | up    | I | head   | 11560.48 | 0.325 | -0.318 |
| normoxia | up    | I | caudal | 2981.74  | 0.084 | -1.039 |
| normoxia | up    | I | mid    | 21057.28 | 0.592 | 0.161  |
| normoxia | down  | 1 | head   | 41947.31 | 0.615 | 0.204  |
| normoxia | down  | 1 | caudal | 9971.61  | 0.146 | -0.766 |
| normoxia | down  | 1 | mid    | 16281.03 | 0.239 | -0.504 |
| normoxia | up    | 2 | head   | 22797.86 | 0.432 | -0.118 |
| normoxia | up    | 2 | caudal | 9680.54  | 0.184 | -0.648 |
| normoxia | up    | 2 | mid    | 20243.55 | 0.384 | -0.205 |
| normoxia | prone | 3 | head   | 38895.85 | 0.425 | -0.131 |
| normoxia | prone | 3 | caudal | 19904.57 | 0.218 | -0.556 |
| normoxia | prone | 3 | mid    | 32695.44 | 0.357 | -0.255 |
| normoxia | down  | 4 | head   | 37525.79 | 0.538 | 0.066  |
| normoxia | down  | 4 | caudal | 8515.38  | 0.122 | -0.857 |
| normoxia | down  | 4 | mid    | 23724.17 | 0.340 | -0.288 |
| normoxia | down  | 5 | head   | 36131.46 | 0.461 | -0.067 |
| normoxia | down  | 5 | caudal | 18651.19 | 0.238 | -0.505 |
| normoxia | down  | 5 | mid    | 23519.6  | 0.300 | -0.367 |
| normoxia | prone | 6 | head   | 22521.03 | 0.397 | -0.181 |
| normoxia | prone | 6 | caudal | 11440.29 | 0.202 | -0.597 |
| normoxia | prone | 6 | mid    | 22732.66 | 0.401 | -0.174 |
| anoxia   | down  | 7 | head   | 33343.53 | 0.562 | 0.109  |
| anoxia   | down  | 7 | caudal | 9786.43  | 0.165 | -0.704 |
| anoxia   | down  | 7 | mid    | 16151.28 | 0.272 | -0.427 |



|          |       |    |        |          |       |        |
|----------|-------|----|--------|----------|-------|--------|
| anoxia   | up    | 8  | head   | 14908.05 | 0.222 | -0.544 |
| anoxia   | up    | 8  | caudal | 34527.88 | 0.514 | 0.025  |
| anoxia   | up    | 8  | mid    | 17688.49 | 0.264 | -0.446 |
| anoxia   | down  | 9  | head   | 26715.9  | 0.441 | -0.103 |
| anoxia   | down  | 9  | caudal | 9935.78  | 0.164 | -0.707 |
| anoxia   | down  | 9  | mid    | 23916.8  | 0.395 | -0.185 |
| anoxia   | up    | 10 | head   | 15612.73 | 0.248 | -0.483 |
| anoxia   | up    | 10 | caudal | 21121.18 | 0.335 | -0.298 |
| anoxia   | up    | 10 | mid    | 26317.01 | 0.417 | -0.145 |
| anoxia   | down  | 11 | head   | 30058.09 | 0.503 | 0.005  |
| anoxia   | down  | 11 | caudal | 16053.76 | 0.269 | -0.435 |
| anoxia   | down  | 11 | mid    | 13661.82 | 0.229 | -0.528 |
| anoxia   | up    | 14 | head   | 14490.21 | 0.256 | -0.464 |
| anoxia   | up    | 14 | caudal | 15634.46 | 0.276 | -0.419 |
| anoxia   | up    | 14 | mid    | 26501.49 | 0.468 | -0.056 |
| anoxia   | down  | 15 | head   | 36655.04 | 0.522 | 0.038  |
| anoxia   | down  | 15 | caudal | 11904.1  | 0.169 | -0.690 |
| anoxia   | down  | 15 | mid    | 21713.04 | 0.309 | -0.350 |
| anoxia   | up    | 16 | head   | 11865.15 | 0.223 | -0.541 |
| anoxia   | up    | 16 | caudal | 12866.4  | 0.242 | -0.495 |
| anoxia   | up    | 16 | mid    | 28387.2  | 0.534 | 0.060  |
| anoxia   | down  | 17 | head   | 35623.21 | 0.522 | 0.039  |
| anoxia   | down  | 17 | caudal | 8770.26  | 0.129 | -0.831 |
| anoxia   | down  | 17 | mid    | 23813.57 | 0.349 | -0.270 |
| anoxia   | up    | 18 | head   | 11959.28 | 0.179 | -0.661 |
| anoxia   | up    | 18 | caudal | 27028.61 | 0.405 | -0.168 |
| anoxia   | up    | 18 | mid    | 27815.98 | 0.416 | -0.147 |
| anoxia   | down  | 19 | head   | 48323.77 | 0.487 | -0.023 |
| anoxia   | down  | 19 | caudal | 24836.07 | 0.250 | -0.477 |
| anoxia   | down  | 19 | mid    | 26124.77 | 0.263 | -0.447 |
| anoxia   | down  | 20 | head   | 20844.68 | 0.344 | -0.280 |
| anoxia   | down  | 20 | caudal | 15174.91 | 0.251 | -0.475 |
| anoxia   | down  | 20 | mid    | 24504.56 | 0.405 | -0.167 |
| normoxia | up    | 23 | head   | 10059.04 | 0.435 | -0.113 |
| normoxia | up    | 23 | caudal | 7185.17  | 0.311 | -0.345 |
| normoxia | up    | 23 | mid    | 5853.9   | 0.253 | -0.469 |
| normoxia | down  | 24 | head   | 7729.12  | 0.303 | -0.361 |
| normoxia | down  | 24 | caudal | 3621.34  | 0.142 | -0.781 |
| normoxia | down  | 24 | mid    | 14122.56 | 0.554 | 0.095  |
| normoxia | prone | 25 | head   | 3975.68  | 0.341 | -0.285 |

|          |       |    |        |          |       |        |
|----------|-------|----|--------|----------|-------|--------|
| normoxia | prone | 25 | caudal | 2758.5   | 0.237 | -0.508 |
| normoxia | prone | 25 | mid    | 4912.13  | 0.422 | -0.137 |
| normoxia | up    | 26 | head   | 5269.98  | 0.379 | -0.215 |
| normoxia | up    | 26 | caudal | 4307.59  | 0.310 | -0.348 |
| normoxia | up    | 26 | mid    | 4331.71  | 0.311 | -0.345 |
| normoxia | down  | 27 | head   | 2722.09  | 0.414 | -0.152 |
| normoxia | down  | 27 | caudal | 1060.2   | 0.161 | -0.717 |
| normoxia | down  | 27 | mid    | 2800.25  | 0.425 | -0.131 |
| normoxia | prone | 28 | head   | 2283.44  | 0.340 | -0.288 |
| normoxia | prone | 28 | caudal | 1495.72  | 0.223 | -0.543 |
| normoxia | prone | 28 | mid    | 2932.94  | 0.437 | -0.110 |
| normoxia | down  | 29 | head   | 42368.35 | 0.470 | -0.052 |
| normoxia | down  | 29 | caudal | 28275.48 | 0.314 | -0.340 |
| normoxia | down  | 29 | mid    | 19510.9  | 0.216 | -0.559 |
| normoxia | prone | 30 | head   | 23309.89 | 0.483 | -0.029 |
| normoxia | prone | 30 | caudal | 10373.45 | 0.215 | -0.562 |
| normoxia | prone | 30 | mid    | 14541.4  | 0.302 | -0.365 |
| normoxia | up    | 31 | head   | 33085.08 | 0.414 | -0.151 |
| normoxia | up    | 31 | caudal | 20037.26 | 0.251 | -0.475 |
| normoxia | up    | 31 | mid    | 26763.52 | 0.335 | -0.298 |
| normoxia | up    | 32 | head   | 24836.72 | 0.302 | -0.364 |
| normoxia | up    | 32 | caudal | 25705.49 | 0.312 | -0.343 |
| normoxia | up    | 32 | mid    | 31738.12 | 0.386 | -0.202 |
| normoxia | down  | 33 | head   | 31988.39 | 0.549 | 0.086  |
| normoxia | down  | 33 | caudal | 8585.21  | 0.147 | -0.762 |
| normoxia | down  | 33 | mid    | 17680.66 | 0.304 | -0.361 |
| normoxia | down  | 34 | head   | 35837.29 | 0.511 | 0.018  |
| normoxia | down  | 34 | caudal | 15878.62 | 0.226 | -0.534 |
| normoxia | down  | 34 | mid    | 18481.23 | 0.263 | -0.447 |
| normoxia | down  | 35 | head   | 24554.51 | 0.384 | -0.205 |
| normoxia | down  | 35 | caudal | 17572.78 | 0.275 | -0.421 |
| normoxia | down  | 35 | mid    | 21771.65 | 0.341 | -0.287 |
| normoxia | up    | 36 | head   | 22003.61 | 0.346 | -0.276 |
| normoxia | up    | 36 | caudal | 15256.63 | 0.240 | -0.500 |
| normoxia | up    | 36 | mid    | 26268.95 | 0.413 | -0.152 |
| normoxia | up    | 37 | head   | 31852.44 | 0.374 | -0.223 |
| normoxia | up    | 37 | caudal | 21270.33 | 0.250 | -0.477 |
| normoxia | up    | 37 | mid    | 32010.57 | 0.376 | -0.220 |
| normoxia | up    | 38 | head   | 22305.46 | 0.180 | -0.660 |
| normoxia | up    | 38 | caudal | 66346.34 | 0.534 | 0.059  |

|          |       |    |        |          |       |        |
|----------|-------|----|--------|----------|-------|--------|
| normoxia | up    | 38 | mid    | 35594.39 | 0.286 | -0.396 |
| normoxia | prone | 39 | head   | 23654.02 | 0.361 | -0.248 |
| normoxia | prone | 39 | caudal | 11494.49 | 0.175 | -0.672 |
| normoxia | prone | 39 | mid    | 30405.24 | 0.464 | -0.063 |

**Table S7.**

Results of 2-way ANOVA, showing that condition (normoxia vs. anoxia) significantly affected hemolymph distribution (logit-transformed proportions for the cranial and caudal segment) within head-up animals.

| Parameter         | DF | SS     | MS     | F      | P         |
|-------------------|----|--------|--------|--------|-----------|
| Condition         | 1  | 0.000  | 0.000  | 0.000  | 1.0       |
| Segment           | 1  | 0.1311 | 0.1311 | 2.718  | 0.1084    |
| condition:segment | 1  | 0.7974 | 0.7974 | 16.533 | 0.0003*** |
| Residuals         | 34 | 1.640  | 0.0482 |        |           |

**Table S8.** Heart rates of grasshoppers measured visually through the dorsal cuticle, after removing the wings, using a light microscope. Locusts were placed into one of three positions (head-up, head-down, prone) in random order. Heart rate was counted three times, 0.5, 2 and 5 min after being placed in position.

| Animal | Position | Time | BPM  |
|--------|----------|------|------|
| 1      | down     | 0.5  | 78.6 |
| 2      | down     | 0.5  | 78.6 |
| 3      | down     | 0.5  | 89.3 |
| 4      | down     | 0.5  | 88.0 |
| 5      | down     | 0.5  | 82.6 |
| 6      | down     | 0.5  | 88.0 |
| 7      | down     | 0.5  | 80.0 |
| 8      | down     | 0.5  | 86.7 |
| 9      | down     | 0.5  | 73.3 |
| 10     | down     | 0.5  | 81.3 |
| 11     | down     | 0.5  | 77.3 |
| 12     | down     | 0.5  | 69.3 |
| 13     | down     | 0.5  | 84.0 |
| 14     | down     | 0.5  | 76.0 |
| 15     | down     | 0.5  | 70.7 |
| 1      | down     | 2    | 81.3 |
| 2      | down     | 2    | 74.7 |
| 3      | down     | 2    | 85.3 |
| 4      | down     | 2    | 81.3 |
| 5      | down     | 2    | 85.3 |
| 6      | down     | 2    | 82.7 |
| 7      | down     | 2    | 85.3 |
| 8      | down     | 2    | 77.3 |
| 9      | down     | 2    | 77.3 |
| 10     | down     | 2    | 86.7 |
| 11     | down     | 2    | 78.7 |
| 12     | down     | 2    | 61.3 |
| 13     | down     | 2    | 74.7 |
| 14     | down     | 2    | 69.3 |
| 15     | down     | 2    | 74.7 |
| 1      | down     | 5    | 80.0 |
| 2      | down     | 5    | 74.7 |
| 3      | down     | 5    | 86.7 |
| 4      | down     | 5    | 78.7 |

|    |       |     |      |
|----|-------|-----|------|
| 5  | down  | 5   | 81.3 |
| 6  | down  | 5   | 84.0 |
| 7  | down  | 5   | 84.0 |
| 8  | down  | 5   | 78.6 |
| 9  | down  | 5   | 70.7 |
| 10 | down  | 5   | 82.7 |
| 11 | down  | 5   | 72.0 |
| 12 | down  | 5   | 66.7 |
| 13 | down  | 5   | 76.0 |
| 14 | down  | 5   | 73.3 |
| 15 | down  | 5   | 68.0 |
| 1  | prone | 0.5 | 81.3 |
| 2  | prone | 0.5 | 73.3 |
| 3  | prone | 0.5 | 76.0 |
| 4  | prone | 0.5 | 78.7 |
| 5  | prone | 0.5 | 76.0 |
| 6  | prone | 0.5 | 88.0 |
| 7  | prone | 0.5 | 85.3 |
| 8  | prone | 0.5 | 80.0 |
| 9  | prone | 0.5 | 76.0 |
| 10 | prone | 0.5 | 78.7 |
| 11 | prone | 0.5 | 64.0 |
| 12 | prone | 0.5 | 62.7 |
| 13 | prone | 0.5 | 77.3 |
| 14 | prone | 0.5 | 74.7 |
| 15 | prone | 0.5 | 73.3 |
| 1  | prone | 2   | 85.3 |
| 2  | prone | 2   | 70.7 |
| 3  | prone | 2   | 84.0 |
| 4  | prone | 2   | 70.7 |
| 5  | prone | 2   | 78.7 |
| 6  | prone | 2   | 88.0 |
| 7  | prone | 2   | 86.7 |
| 8  | prone | 2   | 81.3 |
| 9  | prone | 2   | 70.7 |
| 10 | prone | 2   | 81.3 |
| 11 | prone | 2   | 74.7 |
| 12 | prone | 2   | 62.7 |
| 13 | prone | 2   | 78.7 |

|    |       |     |      |
|----|-------|-----|------|
| 14 | prone | 2   | 76.0 |
| 15 | prone | 2   | 68.0 |
| 1  | prone | 5   | 85.3 |
| 2  | prone | 5   | 73.3 |
| 3  | prone | 5   | 85.3 |
| 4  | prone | 5   | 85.3 |
| 5  | prone | 5   | 78.7 |
| 6  | prone | 5   | 89.3 |
| 7  | prone | 5   | 86.7 |
| 8  | prone | 5   | 80.0 |
| 9  | prone | 5   | 74.7 |
| 10 | prone | 5   | 81.3 |
| 11 | prone | 5   | 72.0 |
| 12 | prone | 5   | 64.0 |
| 13 | prone | 5   | 77.3 |
| 14 | prone | 5   | 73.3 |
| 15 | prone | 5   | 70.7 |
| 1  | up    | 0.5 | 80.0 |
| 2  | up    | 0.5 | 77.3 |
| 3  | up    | 0.5 | 89.3 |
| 4  | up    | 0.5 | 80.0 |
| 5  | up    | 0.5 | 76.0 |
| 6  | up    | 0.5 | 89.3 |
| 7  | up    | 0.5 | 84.0 |
| 8  | up    | 0.5 | 81.3 |
| 9  | up    | 0.5 | 70.7 |
| 10 | up    | 0.5 | 84.0 |
| 11 | up    | 0.5 | 74.7 |
| 12 | up    | 0.5 | 68.0 |
| 13 | up    | 0.5 | 82.7 |
| 14 | up    | 0.5 | 73.3 |
| 15 | up    | 0.5 | 70.7 |
| 1  | up    | 2   | 81.3 |
| 2  | up    | 2   | 73.0 |
| 3  | up    | 2   | 84.0 |
| 4  | up    | 2   | 80.0 |
| 5  | up    | 2   | 81.3 |
| 6  | up    | 2   | 84.0 |
| 7  | up    | 2   | 85.3 |

|    |    |   |      |
|----|----|---|------|
| 8  | up | 2 | 80.0 |
| 9  | up | 2 | 76.0 |
| 10 | up | 2 | 89.3 |
| 11 | up | 2 | 73.3 |
| 12 | up | 2 | 66.7 |
| 13 | up | 2 | 81.3 |
| 14 | up | 2 | 82.7 |
| 15 | up | 2 | 76.0 |
| 1  | up | 5 | 81.3 |
| 2  | up | 5 | 76.0 |
| 3  | up | 5 | 87.7 |
| 4  | up | 5 | 80.0 |
| 5  | up | 5 | 76.0 |
| 6  | up | 5 | 84.0 |
| 7  | up | 5 | 85.3 |
| 8  | up | 5 | 78.7 |
| 9  | up | 5 | 74.7 |
| 10 | up | 5 | 85.3 |
| 11 | up | 5 | 73.3 |
| 12 | up | 5 | 62.0 |
| 13 | up | 5 | 80.0 |
| 14 | up | 5 | 81.3 |
| 15 | up | 5 | 74.7 |



**Table S9.** Heart rates of grasshoppers measured from x-ray video. Each row represents a different individual.

| Head-up | Head-down |
|---------|-----------|
| 51      | 42        |
| 54      | 50        |
| 52      | 50        |
| 68      | 62        |

**Table S10.** Abdominal pumping rates for locusts in different orientations. Ventilation rates are abdominal pumping rates in Hz. The 1 min rates report the average rate during the first min after assuming the stated orientation, and the 5 min rates report the average during the 5 min after assuming that orientation. Animals listed in the order they were tested.

| animal ID | Sex | Prior Orientation | Orientation | ventilation 1 min | ventilation rate 5 min |
|-----------|-----|-------------------|-------------|-------------------|------------------------|
| 1         | F   | prone             | prone       | 0.68              | 0.45                   |
| 2         | F   | prone             | head-up     | 0.55              | 0.53                   |
| 3         | F   | prone             | head-down   | 1.2               | 1.2                    |
| 4         | M   | head-up           | prone       | 0.6               | 0.65                   |
| 5         | M   | head-up           | head-up     | 0.69              | 0.6                    |
| 6         | M   | head-up           | head-down   | 1.01              | 1.02                   |
| 7         | F   | head-down         | prone       | 0.46              | 0.37                   |
| 8         | M   | head-down         | head-up     | 0.47              | 0.42                   |
| 9         | F   | head-down         | head-down   | 0.87              | 0.77                   |
| 10        | F   | prone             | prone       | 0.54              | 0.52                   |
| 11        | F   | prone             | head-up     | 1.16              | 1.57                   |
| 12        | M   | prone             | head-down   | 0.53              | 0.78                   |
| 13        | F   | head-up           | prone       | 0.7               | 0.78                   |
| 14        | M   | head-up           | head-up     | 0.45              | 0.55                   |
| 15        | M   | head-up           | head-down   | 0.41              | 0.65                   |
| 16        | F   | head-down         | prone       | 0.46              | 0.37                   |
| 17        | F   | head-down         | head-up     | 0.66              | 0.67                   |
| 18        | M   | head-down         | head-down   | 0.48              | 0.37                   |
| 19        | F   | prone             | prone       | 0.59              | 0.5                    |
| 20        | F   | prone             | head-up     | 0.8               | 0.68                   |
| 21        | M   | prone             | head-down   | 0.96              | 0.98                   |
| 22        | F   | head-up           | prone       | 1.02              | 0.93                   |
| 23        | F   | head-up           | head-up     | 0.88              | 0.83                   |
| 24        | F   | head-up           | head-down   | 0.92              | 1.22                   |
| 25        | M   | head-down         | prone       | 0.75              | 0.82                   |
| 26        | M   | head-down         | head-up     | 0.77              | 0.82                   |
| 27        | F   | head-down         | head-down   | 0.95              | 1                      |
| 28        | M   | prone             | prone       | 0.68              | 0.7                    |
| 29        | F   | prone             | head-up     | 0.74              | 0.83                   |
| 30        | M   | prone             | head-down   | 0.8               | 0.8                    |
| 31        | M   | head-up           | prone       | 0.8               | 0.72                   |
| 32        | F   | head-up           | head-up     | 0.96              | 1.02                   |
| 33        | M   | head-up           | head-down   | 0.93              | 0.8                    |
| 34        | M   | head-down         | head-up     | 0.85              | 0.78                   |
| 35        | F   | head-down         | prone       | 1.17              | 1.13                   |

|    |   |           |           |      |      |
|----|---|-----------|-----------|------|------|
| 36 | F | head-down | head-down | 0.79 | 1.15 |
| 37 | M | prone     | prone     | 0.84 | 0.84 |
| 38 | F | prone     | head-up   | 0.59 | 1.02 |
| 39 | F | prone     | head-down | 0.81 | 0.7  |
| 40 | M | head-up   | prone     | 0.92 | 0.82 |
| 41 | M | head-down | head-up   | 0.76 | 0.75 |
| 42 | M | head-up   | head-down | 0.7  | 0.65 |
| 43 | F | head-down | prone     | 0.73 | 0.97 |
| 44 | M | head-down | head-up   | 0.73 | 0.7  |
| 45 | F | head-down | head-down | 0.94 | 0.83 |
| 46 | F | prone     | prone     | 0.69 | 0.68 |
| 47 | M | prone     | head-up   | 0.93 | 0.8  |
| 48 | M | prone     | head-down | 1.2  | 1.15 |
| 49 | M | head-up   | prone     | 0.84 | 0.83 |
| 50 | M | head-up   | head-up   | 0.9  | 0.93 |
| 51 | M | head-up   | head-down | 1.06 | 0.93 |
| 52 | F | head-down | prone     | 0.9  | 0.85 |
| 53 | F | head-down | head-up   | 0.57 | 0.6  |
| 54 | F | head-down | head-down | 0.94 | 0.82 |
| 55 | M | prone     | prone     | 0.72 | 0.67 |
| 56 | F | prone     | head-up   | 0.96 | 0.9  |
| 57 | F | prone     | head-down | 1.37 | 1.35 |
| 58 | F | head-up   | prone     | 0.93 | 0.87 |
| 59 | M | head-down | head-up   | 0.99 | 0.78 |
| 60 | F | head-up   | head-down | 0.86 | 0.8  |
| 61 | M | head-down | prone     | 0.53 | 0.43 |
| 62 | M | head-down | head-up   | 1.19 | 0.82 |
| 63 | F | head-down | head-down | 0.87 | 0.92 |
| 64 | M | prone     | prone     | 1.15 | 1    |
| 65 | M | prone     | head-up   | 0.51 | 0.5  |
| 66 | F | prone     | head-down | 1.12 | 1.02 |
| 67 | M | head-up   | prone     | 0.95 | 1.15 |
| 68 | F | head-up   | head-up   | 0.63 | 0.75 |
| 69 | F | head-up   | head-down | 0.83 | 0.87 |
| 70 | M | head-down | prone     | 0.45 | 0.57 |
| 71 | M | head-down | head-up   | 0.57 | 0.47 |
| 72 | M | head-down | head-down | 0.77 | 0.67 |
| 73 | M | prone     | prone     | 0.56 | 0.45 |
| 74 | F | prone     | head-up   | 0.87 | 0.93 |
| 75 | M | prone     | head-down | 0.68 | 0.63 |

|    |   |           |           |      |      |
|----|---|-----------|-----------|------|------|
| 76 | M | head-up   | prone     | 0.95 | 0.98 |
| 77 | F | head-up   | head-up   | 0.59 | 0.48 |
| 78 | M | head-up   | head-down | 0.58 | 0.52 |
| 79 | M | head-down | prone     | 0.31 | 0.3  |
| 80 | F | head-down | head-up   | 0.47 | 0.62 |
| 81 | F | head-down | head-down | 0.54 | 0.57 |
| 82 | F | prone     | prone     | 0.79 | 0.7  |
| 83 | F | prone     | head-up   | 0.84 | 0.83 |
| 84 | M | prone     | head-down | 0.83 | 0.88 |
| 85 | M | head-up   | prone     | 0.87 | 0.8  |
| 86 | F | head-up   | head-up   | 1.2  | 1.13 |
| 87 | F | head-up   | head-down | 1.17 | 1.1  |
| 88 | M | head-down | prone     | 0.66 | 0.62 |
| 89 | M | head-down | head-up   | 0.81 | 0.68 |
| 90 | M | head-down | head-down | 0.69 | 0.7  |
| 91 | F | prone     | prone     | 0.85 | 0.77 |
| 92 | M | prone     | head-up   | 0.66 | 0.65 |
| 93 | M | prone     | head-down | 0.82 | 0.87 |
| 94 | F | head-up   | prone     | 0.58 | 0.63 |
| 95 | F | head-up   | head-up   | 0.66 | 0.58 |
| 96 | M | head-up   | head-down | 0.98 | 0.98 |
| 97 | M | head-down | prone     | 0.96 | 0.77 |
| 98 | F | head-down | head-up   | 0.66 | 0.67 |
| 99 | F | head-down | head-down | 1.08 | 0.93 |

**Table S11.** Summary statistics for the regressions shown in Figure S4.

| Specimen number | Number of data points | Slope (CI) of the fit line | Intercept (CI) of the fit line | R <sub>2</sub> |
|-----------------|-----------------------|----------------------------|--------------------------------|----------------|
| 1               | 1205                  | 0.83±0.12                  | 0.36± 0.16                     | 0.69           |
| 2               | 1272                  | 0.28±0.27                  | 1.36± 0.36                     | 0.12           |
| 3               | 1962                  | 0.58±0.08                  | 0.53±0.11                      | 0.59           |
| 4               | 1649                  | 0.62±0.05                  | 0.79±0.10                      | 0.71           |
| 5               | 772                   | 1.24±0.05                  | -0.04±0.06                     | 0.81           |
| 6               | 655                   | 0.99±0.07                  | -0.04±0.05                     | 0.75           |
| 7               | 2952                  | 1.12±0.04                  | -0.05±0.05                     | 0.90           |
| 8               | 703                   | 0.37±0.10                  | 0.44±0.10                      | 0.43           |
| 9               | 1288                  | 3.26±1.46                  | -2.65±1.69                     | 0.32           |

**Table S12.** Mean static pressure changes and calculated expected values, from figure S5.

| Thorax         | HO -HD | HO -HU | HD-HO | HU-HO |
|----------------|--------|--------|-------|-------|
| Specimen 1     | 0.12   | 0.23   | -0.16 | 0.19  |
| Specimen 2     | 0.44   | 0.37   | -0.45 | 0.06  |
| Specimen 3     | 0.19   | 0.46   | 0.44  | 0.37  |
| Specimen 4     | 0.15   | 0.38   | 0.33  | 0.13  |
| Specimen 5     | -0.05  | -0.35  | -0.16 | 0.44  |
| Specimen 6     | 0.06   | -0.03  | -0.14 | 0.04  |
| Specimen 7     | -0.26  | 0.13   | 0.16  | 0.36  |
| Specimen 8     | 0.01   | 0.66   | 0.01  | 0.10  |
| Specimen 9     | 0.03   | -0.08  | -0.01 | 0.09  |
| Specimen 10    | -0.24  | -0.06  | -0.20 | 0.02  |
| Mean           | 0.05   | 0.17   | -0.02 | 0.18  |
| SE of Mean     | 0.07   | 0.10   | 0.08  | 0.05  |
| Expected Value | 0.30   | 0.01   | -0.30 | -0.01 |

  

| Abdomen        | HO -HD | HO -HU | HD-HO | HU-HO |
|----------------|--------|--------|-------|-------|
| Specimen 1     | 0.12   | 0.23   | -0.16 | 0.19  |
| Specimen 2     | 0.44   | 0.37   | -0.45 | 0.06  |
| Specimen 3     | 0.19   | 0.46   | 0.44  | 0.37  |
| Specimen 4     | 0.15   | 0.38   | 0.33  | 0.13  |
| Specimen 5     | -0.05  | -0.35  | -0.16 | 0.44  |
| Specimen 6     | 0.06   | -0.03  | -0.14 | 0.04  |
| Specimen 7     | -0.26  | 0.13   | 0.16  | 0.36  |
| Specimen 8     | 0.01   | 0.66   | 0.01  | 0.10  |
| Specimen 9     | 0.03   | -0.08  | -0.01 | 0.09  |
| Specimen 10    | -0.24  | -0.06  | -0.2  | 0.02  |
| Mean           | 0.05   | 0.17   | -0.02 | 0.18  |
| SE of Mean     | 0.07   | 0.10   | 0.08  | 0.05  |
| Expected Value | 0.08   | 0.23   | -0.08 | -0.23 |

**Fig. S1.** Example image analyzed for the proportion of the image occupied by air sacs and tracheae. This is an image of a caudal region (near abdominal tip) for a head-down animal. A. Raw x-ray image. B. Air sacs traced in yellow, tracheae traced in blue, body outline traced in purple.

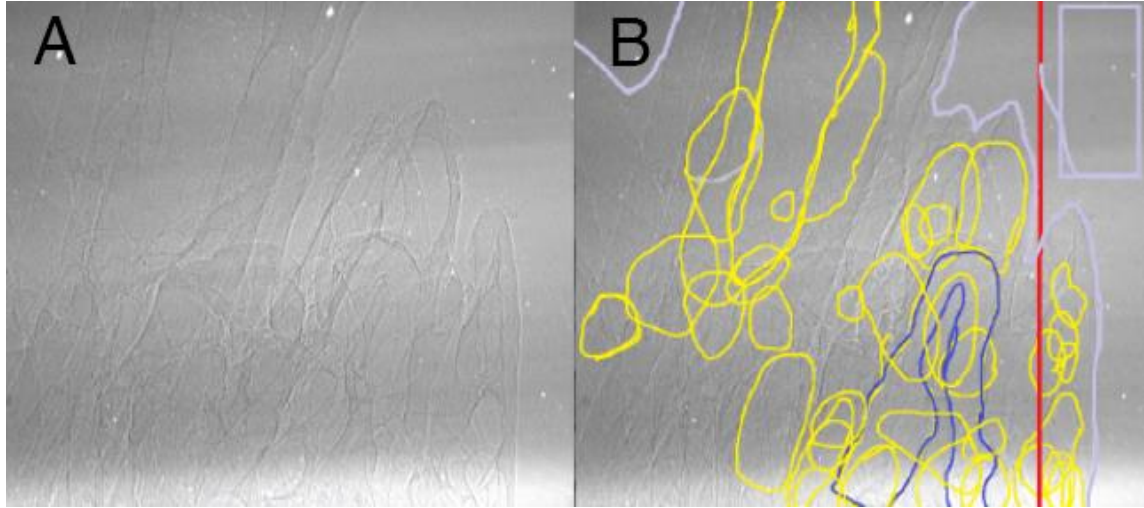

**Fig. S2.** Enlarged  $\mu$ CT images from figure 2 with tubes and automotive grease removed for image analysis (left).  $\mu$ CT images of the grasshopper fixed with by automotive grease (grey, right-top) and unobstructed thoracic spiracles indicated with arrows (right-bottom).

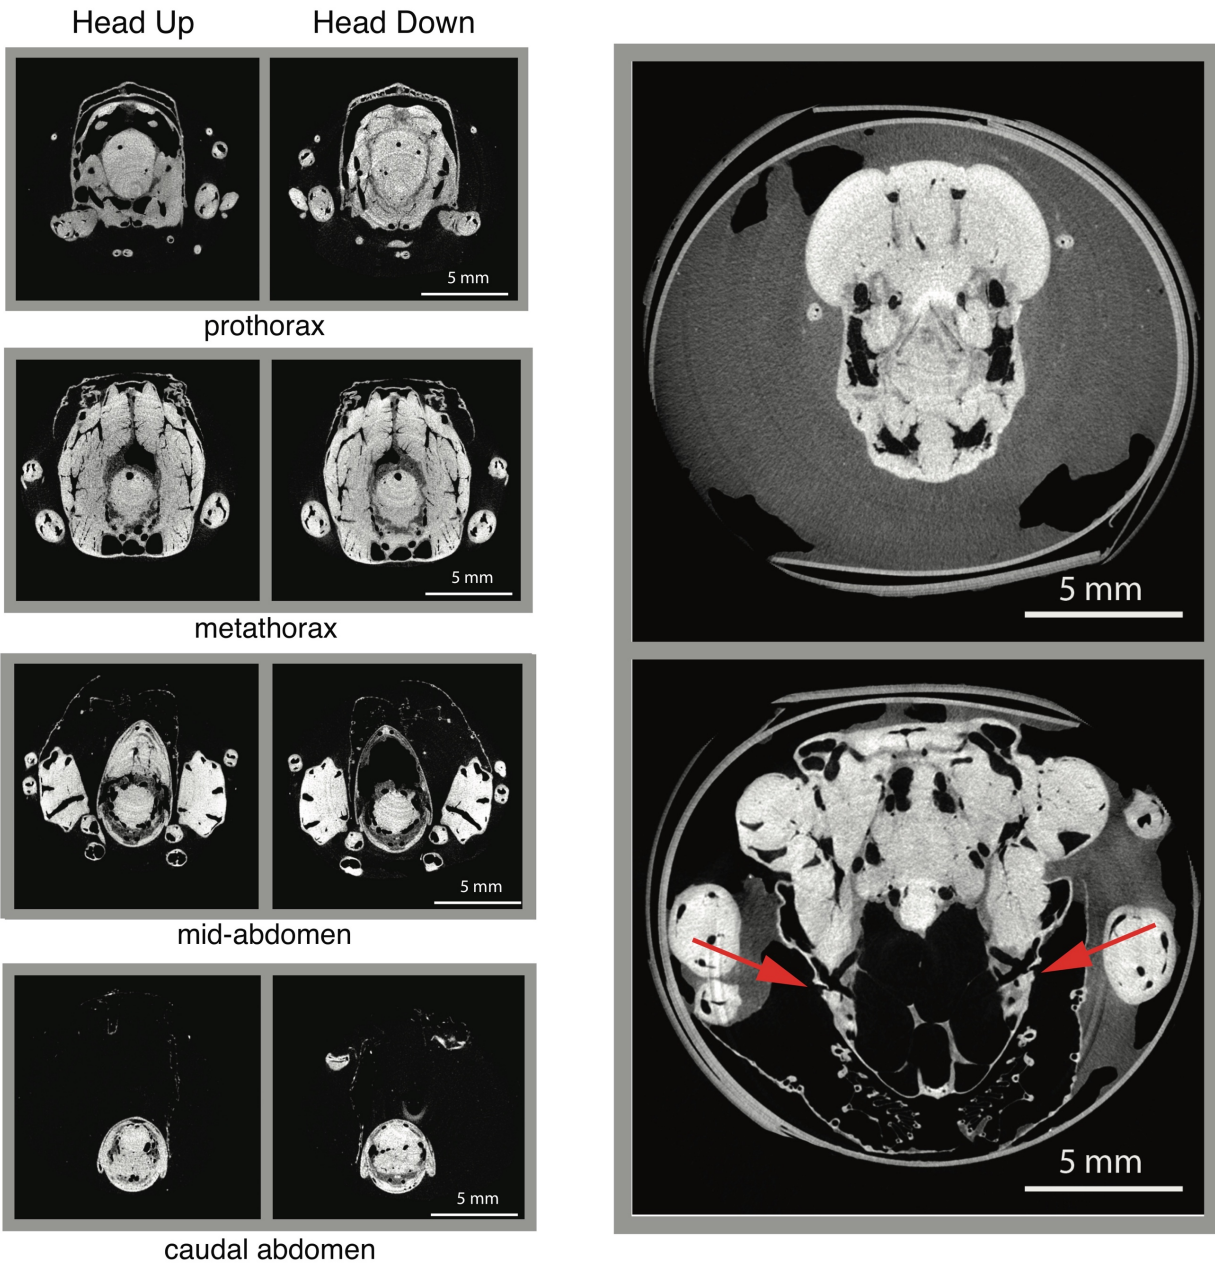



**Fig. S3.** Output of heart rate counter tool used to analyze synchrotron x-ray video of the tracheae surrounding the locust heart. Each peak indicates a movement of the cardiac tracheae.

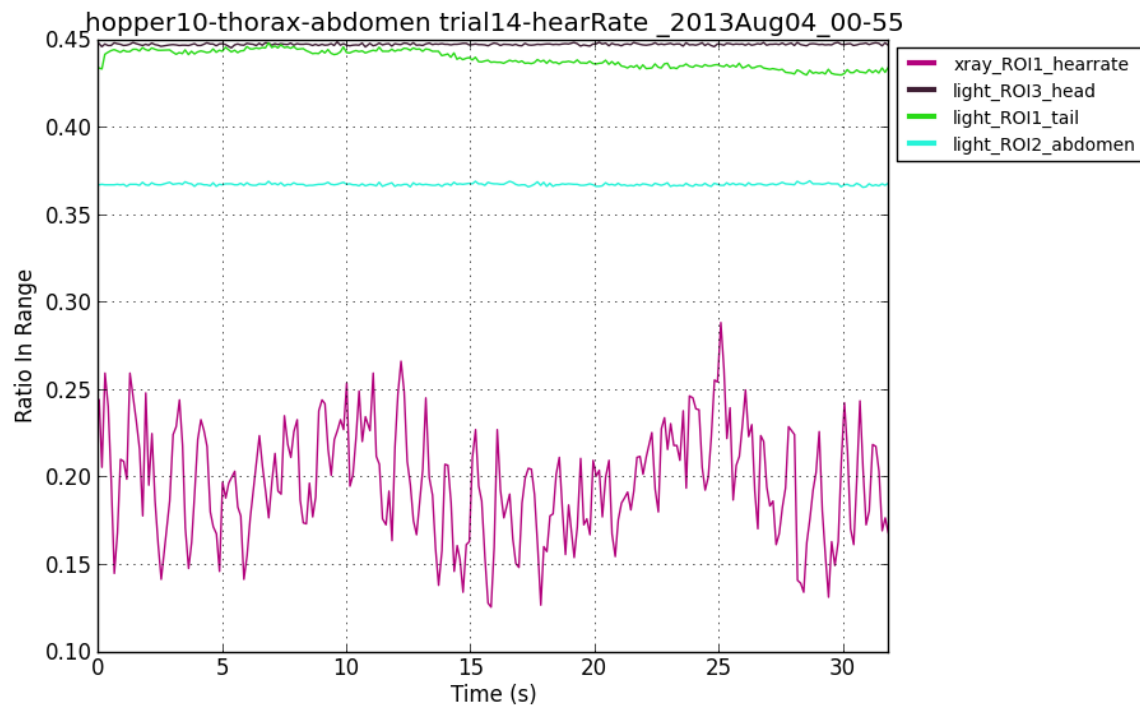

**Fig. S4.** Hemolymph pressure plots for each individual specimen. Each data point represents the maximum pressure for pressure pulsations measured at two locations in the body (points 1 and 2). The red line represents a fit using the total least square method as calculated in (1). Slopes, intercepts, and confidence limits for these plots are in Table S11. In this fit, only larger pressure pulsations are included; specifically, points in which  $P_1 > 0.5$  and  $P_2 > 0.5$  kPa (blue dots) due to concerns that low pressures could result from occlusion of the sensor tip. The green dots represent points that do not meet these criteria. A previous study determined that a slow coagulation of hemolymph around the sensor tips resulted in an error of 5% (1). Therefore, if the calculated slope range is beyond  $1.0 \pm 0.05$ , we considered that  $P_1 \neq P_2$  with a confidence of 95%. Using this definition, the data show that the pressure pulses in the thorax and abdomen are significantly different in all specimens except one animal (#6).

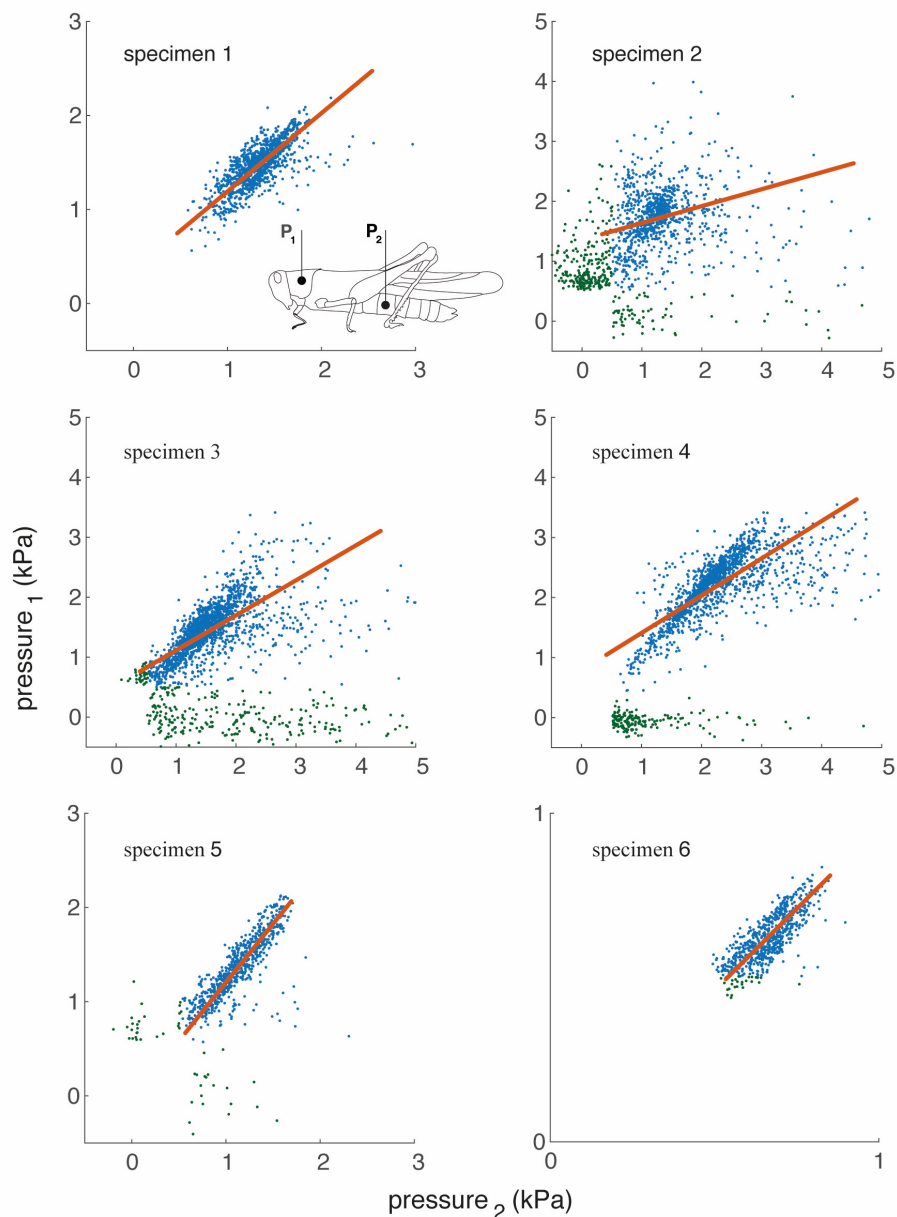

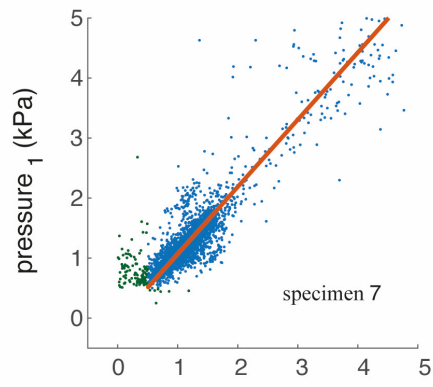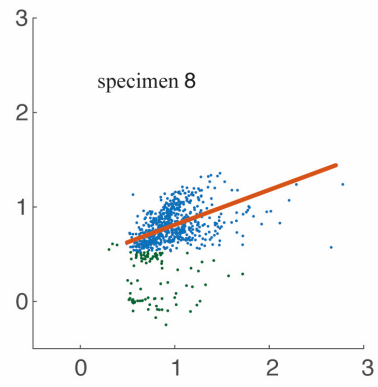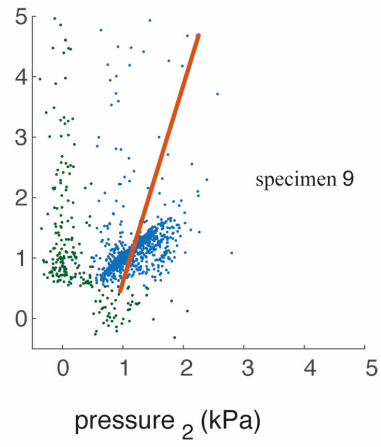

**Figure S5. Theoretical consideration of hemolymph pressures in *Schistocerca americana*.**

Pressures were experimentally measured at two locations (i): in the thorax ( $P_1$ ) and the abdomen ( $P_2$ ), separated by a distance of approximately 1.5 cm. In the schematic illustrations (ii-v), the hemocoel is considered as a fluidic container. In (ii), pressures at the thorax and abdomen are determined by hydrostatic pressures, set by the different heights ( $h_1$ ,  $h_2$ ) of the fluidic column above each location. Compared to (ii), the magnitude of  $h_2$  would decrease if the hemocoel were functionally compartmentalized, represented in (iii) by a barrier (gray circle);  $h_1$  would remain the same. If the cylinder were reoriented to the horizontal position, both  $h_1$  and  $h_2$  would change. Because we found no effect of body orientation on pressures, we conclude that hydrostatic pressures are relatively unimportant. Hemolymph flows at either location (speeds  $u_1$  and  $u_2$ , iv) would add a dynamic pressure contribution. However, as discussed in the main body, our data demonstrate that the dynamic pressure contribution must be negligible. Finally, pressure differences between  $P_1$  and  $P_2$  could be due to losses due to viscous shear as hemolymph is pushed through confined spaces separating the thorax and abdomen. As discussed in the main body by analyzing a connecting pipe (vi), this effect is plausible but unlikely.

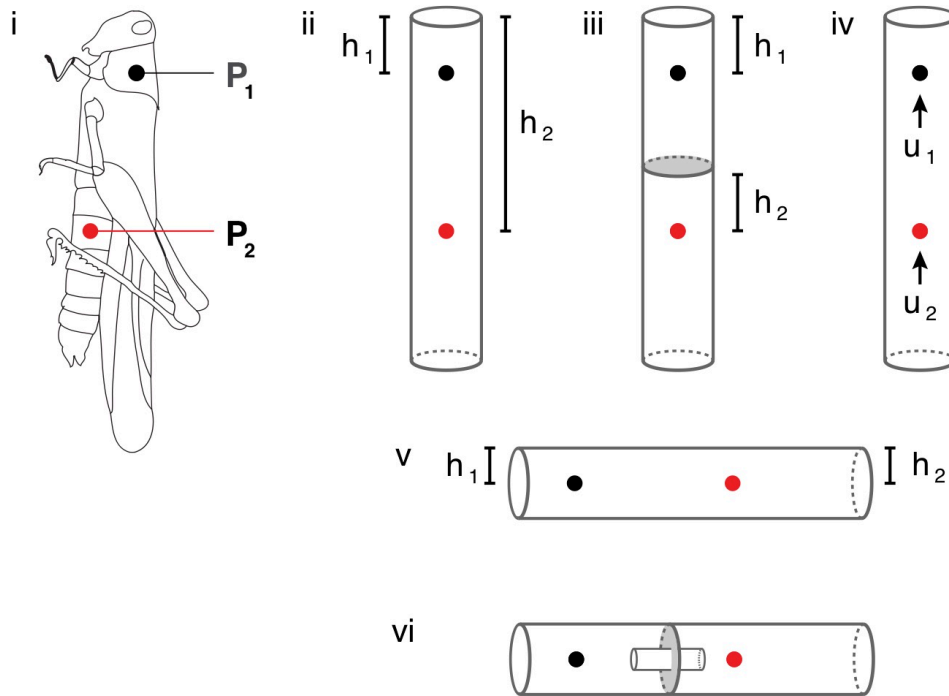

**Fig. S6.** Locusts were able to regulate thorax and abdominal hemolymph pressures at statistically constant levels during changes in body orientation (Paired t tests, all P's > 0.05). Red circles indicate predicted changes in pressure due to passive effects of gravity. Results and predicted values can be found in supplemental table S11.

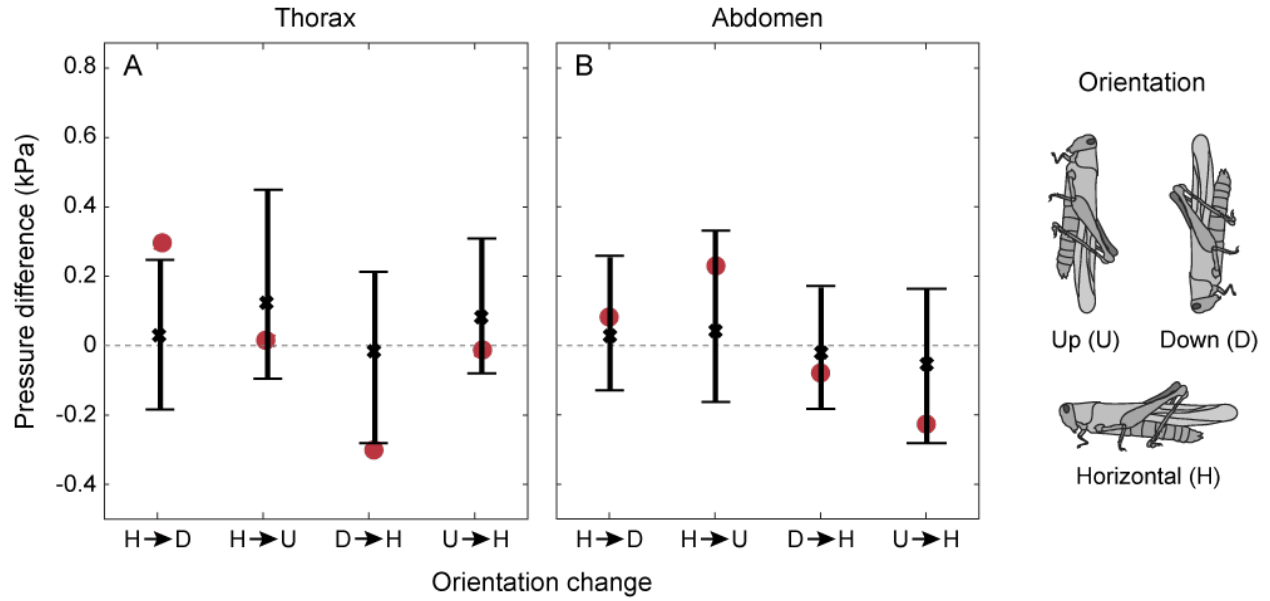

**Fig. S7.** Distribution plot of pressure differences between thorax and abdomen, including all data. Negative values indicate that pressures in the thorax were higher than in the abdomen, and positive values the reverse. The average absolute value pressure difference was 350 pascals (standard deviation = 527 pascals, mean pulse duration = 1.33 s, standard deviation = 0.69 s).

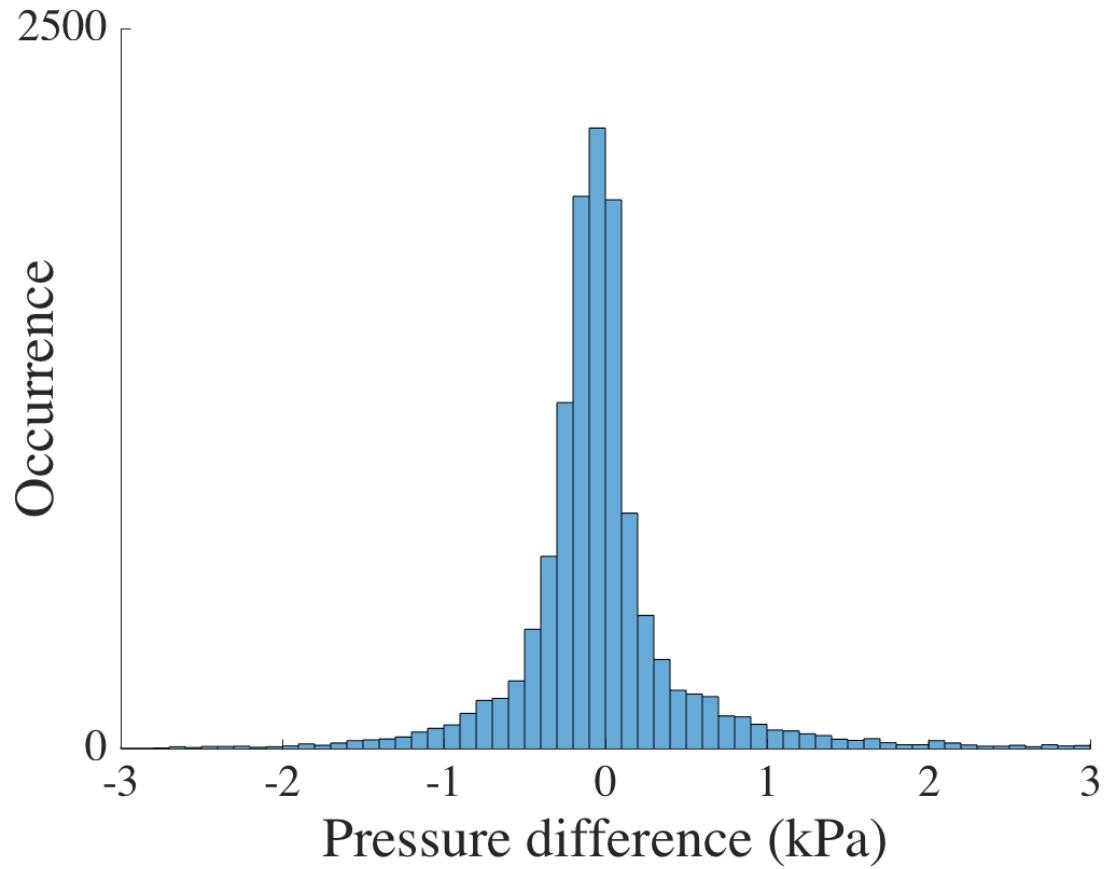

**Supplementary movies S1.** Left: Light video of grasshopper mounted head-down with automated ventilation counter. Right: Simultaneous x-ray imaging of air sacs inside locust.

**Supplementary movies S2.** Left: X-ray video of cardiac tracheae of *S. americana*, with overlaying pulse-counter. Right: Output of heart rate counter.

### **References:**

1. H. Pendar, J. Aviles, K. Adjerid, C. Schoenewald, J. J. Socha, Functional compartmentalization in the hemocoel of insects. *Scientific Reports* **9**, 6075 (2019).
